# Supplementary material for: Variation in Membrane Trafficking Linked to SNARE AtSYP51 Interaction With Aquaporin NIP1;1
Source: PubMed Central journal article supplement (PMC6334215; doi:10.3389/fpls.2018.01949), 2019-01-09
Supplement: Data_Sheet_1.pdf [file Data_Sheet_1.pdf]

## *Supplementary Material*

### **Variation in membrane trafficking linked to SNARE AtSYP51 interaction with aquaporin NIP1;1**

Fabrizio Barozzi<sup>1</sup>, Paride Papadia<sup>2\*</sup>, Giovanni Stefano<sup>3</sup>, Luciana Renna<sup>3</sup>, Federica Brandizzi<sup>3</sup>, Danilo Migoni<sup>2</sup>, Francesco Paolo Fanizzi<sup>2</sup>, Gabriella Piro<sup>1</sup>, Gian-Pietro Di Sansebastiano<sup>1\*</sup>

- 1- Laboratory of Botany, DISTEBA (Diartimento di scienze e tecnologie biologiche e ambientali), University of Salento, Lecce, Italy
- 2- Laboratory of General and Inorganic Chemistry, DISTEBA (Diartimento di scienze e tecnologie biologiche e ambientali), University of Salento, Lecce, Italy
- 3- MSU DOE-Plant Biology Lab, Michigan State University, East Lansing, USA, Michigan

\* Correspondence: Prof. Gian-Pietro Di Sansebastiano, [gp.disansebastiano@unisalento.it](mailto:gp.disansebastiano@unisalento.it) ; Prof. Paride Papadia, [paride.papadia@unisalento.it](mailto:paride.papadia@unisalento.it).

## Supplementary Tables

| Name      | Tair accession number | Function                                                                                                                                                                                                                                                            |
|-----------|-----------------------|---------------------------------------------------------------------------------------------------------------------------------------------------------------------------------------------------------------------------------------------------------------------|
| SYP121    | At3g11820             | SNAP receptor activity, protein binding, SNARE binding, protein membrane anchor.                                                                                                                                                                                    |
| TIP2;2    | At4g17340             | water channel activity.                                                                                                                                                                                                                                             |
| At5g01430 | At5g01430             | molecular_function_unknown.                                                                                                                                                                                                                                         |
| KCO1      | At5g55630             | outward rectifier potassium channel activity, ion channel activity, metal ion binding, calcium-activated potassium channel activity, potassium ion leak channel activity.                                                                                           |
| MAN1      | At3g08040             | transporter activity, antiporter activity, citrate transmembrane transporter activity, drug transmembrane transporter activity, metal ion transmembrane transporter activity.                                                                                       |
| NPSN12    | At1g48240             | SNAP receptor activity, SNARE binding, protein transporter activity.                                                                                                                                                                                                |
| At4g38250 | At4g38250             | amino acid transmembrane transporter activity, neutral amino acid transmembrane transporter activity.                                                                                                                                                               |
| TIP2;1    | At3g16240             | water channel activity, identical protein binding, methylammonium transmembrane transporter activity, urea transmembrane transporter activity, ammonium transmembrane transporter activity.                                                                         |
| At1g64150 | At1g64150             | magnesium ion transmembrane transporter activity, manganese ion transmembrane transporter activity.                                                                                                                                                                 |
| UMAMIT41  | At3g28050             | transmembrane transporter activity.                                                                                                                                                                                                                                 |
| At4g35080 | At4g35080             | nickel cation transmembrane transporter activity.                                                                                                                                                                                                                   |
| SYP132    | At5g08080             | SNAP receptor activity, SNARE binding                                                                                                                                                                                                                               |
| PIP2;8    | At2g16850             | water channel activity, protein binding.                                                                                                                                                                                                                            |
| UMAMIT33  | At4g28040             | transmembrane transporter activity.                                                                                                                                                                                                                                 |
| At5g04160 | At5g04160             | organic anion transmembrane transporter activity.                                                                                                                                                                                                                   |
| KMS1      | At4g14950             | molecular_function_unknown.                                                                                                                                                                                                                                         |
| PTR2-B    | At2g02040             | peptide transmembrane transporter activity, peptide:proton symporter activity, oligopeptide transmembrane transporter activity, high-affinity oligopeptide transmembrane transporter activity, tripeptide transmembrane transporter activity, transporter activity. |
| DIT2.1    | At5g64290             | oxaloacetate transmembrane transporter activity, L-glutamate transmembrane transporter activity, malate transmembrane transporter activity, transporter activity, oxoglutarate:malate antiporter activity.                                                          |
| UMAMIT18  | At1g44800             | L-amino acid efflux transmembrane transporter activity, amino acid transmembrane transporter activity, protein binding.                                                                                                                                             |
| PIP2;3    | At2g37180             | protein binding, water channel activity.                                                                                                                                                                                                                            |
| At3g21690 | At3g21690             | drug transmembrane transporter activity, antiporter activity, transporter activity.                                                                                                                                                                                 |
| NPSN13    | At3g17440             | SNARE binding, SNAP receptor activity.                                                                                                                                                                                                                              |
| UTr7      | At4g31600             | UDP-glucose transmembrane transporter activity, UDP-galactose transmembrane transporter activity.                                                                                                                                                                   |
| At3g57280 | At3g57280             | fatty acid transmembrane transporter activity.                                                                                                                                                                                                                      |
| SEP1      | At4g34190             | chlorophyll binding.                                                                                                                                                                                                                                                |
| At1g29060 | At1g29060             | molecular_function_unknown.                                                                                                                                                                                                                                         |
| VIT1      | At2g01770             | iron ion transmembrane transporter activity, manganese ion transmembrane transporter activity.                                                                                                                                                                      |
| SYP131    | At3g03800             | SNAP receptor activity, SNARE binding.                                                                                                                                                                                                                              |

|           |           |                                                                                                                                                                                                                                    |
|-----------|-----------|------------------------------------------------------------------------------------------------------------------------------------------------------------------------------------------------------------------------------------|
| PUP11     | At1g44750 | purine nucleobase transmembrane transporter activity.                                                                                                                                                                              |
| NRAMP4    | At5g67330 | manganese ion transmembrane transporter activity, cadmium ion transmembrane transporter activity, inorganic anion transmembrane transporter activity, metal ion transmembrane transporter activity.                                |
| UMAMIT29  | At4g01430 | L-glutamine transmembrane transporter activity, transmembrane transporter activity.                                                                                                                                                |
| UTR3      | At1g14360 | pyrimidine nucleotide-sugar transmembrane transporter activity, UDP-galactose transmembrane transporter activity, UDP-glucose transmembrane transporter activity, antiporter activity.                                             |
| SYP31     | At5g05760 | protein binding, SNAP receptor activity, SNARE binding.                                                                                                                                                                            |
| VAMP722   | At2g33120 | SNARE binding, SNAP receptor activity.                                                                                                                                                                                             |
| PIP2;7    | At4g35100 | water channel activity, protein binding.                                                                                                                                                                                           |
| AAP4      | At5g63850 | amino acid transmembrane transporter activity, acidic amino acid transmembrane transporter activity, neutral amino acid transmembrane transporter activity, primary active transmembrane transporter activity, symporter activity. |
| SIP1;2    | At5g18290 | water channel activity.                                                                                                                                                                                                            |
| GLT1      | At5g16150 | carbohydrate transmembrane transporter activity, glucose transmembrane transporter activity, carbohydrate:proton symporter activity.                                                                                               |
| At5g23550 | At5g23550 | molecular_function_unknown.                                                                                                                                                                                                        |
| At1g47530 | At1g47530 | antiporter activity, transporter activity, drug transmembrane transporter activity.                                                                                                                                                |
| SYP51     | At1g16240 | SNAP receptor activity, protein binding, SNARE binding.                                                                                                                                                                            |
| Tic20-II  | At2g47840 | transport.                                                                                                                                                                                                                         |
| NIP1;1    | At4g19030 | arsenite transmembrane transporter activity, water channel activity, protein binding.                                                                                                                                              |
| AVA-P4    | At1g75630 | proton-transporting ATPase activity, rotational mechanism, proton transmembrane transporter activity, ATPase activity.                                                                                                             |
| At1g12390 | At1g12390 | protein binding.                                                                                                                                                                                                                   |
| UMAMIT5   | At1g75500 | transmembrane transporter activity.                                                                                                                                                                                                |
| PIP1;5    | At4g23400 | water channel activity, protein binding.                                                                                                                                                                                           |
| SWEET1    | At1g21460 | sugar transmembrane transporter activity, protein binding.                                                                                                                                                                         |
| UTR1      | At2g02810 | antiporter activity, UDP-glucose transmembrane transporter activity, UDP-galactose transmembrane transporter activity, pyrimidine nucleotide-sugar transmembrane transporter activity.                                             |
| TIP3;1    | At1g73190 | water channel activity.                                                                                                                                                                                                            |
| At1g62880 | At1g62880 | molecular_function_unknown.                                                                                                                                                                                                        |
| TOM22-V   | At5g43970 | P-P-bond-hydrolysis-driven protein transmembrane transporter activity.                                                                                                                                                             |
| VAP27     | At3g60600 | protein binding.                                                                                                                                                                                                                   |
| PUP4      | At1g30840 | purine nucleobase transmembrane transporter activity.                                                                                                                                                                              |
| At2g16800 | At2g16800 | nickel cation transmembrane transporter activity.                                                                                                                                                                                  |
| ECH       | At1g09330 | molecular_function_unknown.                                                                                                                                                                                                        |
| PHT4;4    | At4g00370 | inorganic phosphate transmembrane transporter activity, L-ascorbic acid transmembrane transporter activity, organic anion transmembrane transporter activity, inorganic phosphate transmembrane transporter activity.              |
| CLC-A     | At5g40890 | protein binding, voltage-gated chloride channel activity, nitrate:proton symporter activity, nitrate transmembrane transporter activity, anion channel activity.                                                                   |
| UMAMIT14  | At2g39510 | L-glutamine transmembrane transporter activity.                                                                                                                                                                                    |

|         |           |                                                                                                                                      |
|---------|-----------|--------------------------------------------------------------------------------------------------------------------------------------|
| ERDL6   | At1g75220 | glucose transmembrane transporter activity, carbohydrate transmembrane transporter activity, carbohydrate:proton symporter activity. |
| BET12   | At4g14455 | SNAP receptor activity, protein transporter activity.                                                                                |
| VAMP725 | At2g32670 | SNAP receptor activity, SNARE binding.                                                                                               |
| VAMP721 | At1g04750 | SNAP receptor activity, protein binding, SNARE binding.                                                                              |
| SYP43   | At3g05710 | SNARE binding, SNAP receptor activity.                                                                                               |
| SYP22   | At5g46860 | SNAP receptor activity, protein binding, SNARE binding.                                                                              |
| VAMP724 | At4g15780 | SNAP receptor activity, SNARE binding.                                                                                               |
| YKT61   | At5g58060 | transport.                                                                                                                           |
| SYP21   | At5g16830 | protein binding, SNAP receptor activity, SNARE binding.                                                                              |
| SYP24   | At1g32270 | SNARE binding, SNAP receptor activity.                                                                                               |
| SYP32   | At3g24350 | SNAP receptor activity, SNARE binding.                                                                                               |
| SYP41   | At5g26980 | SNAP receptor activity, protein binding, SNARE binding.                                                                              |
| SYP61   | At1g28490 | SNAP receptor activity, protein binding, SNARE binding.                                                                              |
| SYP52   | At1g79590 | SNAP receptor activity, SNARE binding.                                                                                               |
| SYP112  | At2g18260 | SNAP receptor activity, SNARE binding.                                                                                               |
| VTI12   | At1g26670 | protein binding, SNARE binding, soluble NSF attachment protein activity, SNAP receptor activity.                                     |
| VAMP713 | At5g11150 | SNARE binding, SNAP receptor activity.                                                                                               |
| VTI13   | At3g29100 | SNARE binding, SNAP receptor activity.                                                                                               |
| VTI11   | At5g39510 | protein binding, SNAP receptor activity, SNARE binding, protein binding.                                                             |
| SYP42   | At4g02195 | protein binding, SNARE binding, SNAP receptor activity.                                                                              |
| SNAP33  | At5g61210 | SNAP receptor activity, protein binding.                                                                                             |
| SYP124  | At1g61290 | SNAP receptor activity, SNARE binding.                                                                                               |
| PHO1-H6 | At2g03250 | phosphate ion transmembrane transporter activity.                                                                                    |
| CLC-D   | At5g26240 | voltage-gated chloride channel activity, protein binding, anion channel activity.                                                    |
| AVT6E   | At1g80510 | amino acid transmembrane transporter activity.                                                                                       |

**Supplementary Table 1:** Proteins included in the network shown in figure 1.

| Primer name          | Primer sequence                                          | Template                                     | pDEST plasmid                                                   |
|----------------------|----------------------------------------------------------|----------------------------------------------|-----------------------------------------------------------------|
| SECFWATTB1           | GGGGACAAGTTTGTACAAAAAAGCAG<br>GCTTTATGAAGACTAATCTTTTTC   | GFPgl133Chi, GFPKDEL                         | pK2GW7                                                          |
| CHIRVATTB2           | GGGGACCACTTTGTACAAGAAAGCTGG<br>GTATTACATAGTATCGACTAAAA   | GFPgl133Chi                                  | pK2GW7                                                          |
| KDELRVATTB2          | GGGGACCACTTTGTACAAGAAAGCTGG<br>GTATCAGAGCTCGTCTTGCTGCG   | GFPKDEL                                      | pK2GW7                                                          |
| STFWATTB1            | GGGGACAAGTTTGTACAAAAAAGCAG<br>GCTTTATGATTCATACCAACTTGA   | Rat Sialyltransferase (first 53 aa)          | pK7FWG2                                                         |
| STRVATTB2            | GGGGACCACTTTGTACAAGAAAGCTGG<br>GTACATGGCCACTTTCTCTGCGC   | Rat Sialyltransferase (first 53 aa)          | pK7FWG2                                                         |
| NIP1;1FWATTB1        | GGGGACAAGTTTGTACAAAAAAGCAG<br>GCTTAATGGCGGATATCTCGGGA    | CDS of AtNIP1;1<br>(At4g19030)               | pK7WGF2, pK7FWG2,<br>pH7WGR2, pBiFCt-2in1<br>NC, pBiFCt-2in1 NN |
| NIP1;1RVATTB2        | GGGGACCACTTTGTACAAGAAAGCTGG<br>GTATTAGTGCTACCGATTCTCA    | CDS of AtNIP1;1<br>(At4g19030)               | pK7WGF2, pH7WGR2                                                |
| NIP1;1NOSTOPRV ATTB2 | GGGGACCACTTTGTACAAGAAAGCTGG<br>GTAAGTGCTACCGATTCTCACGG   | CDS of AtNIP1;1<br>(At4g19030)               | pK7FWG2                                                         |
| NIP1;1RVATTB4        | GGGGACAACCTTTGTATAGAAAAGTTGG<br>GTTCAAGTGCTACCGATTCTCAC  | CDS of AtNIP1;1<br>(At4g19030)               | pBiFCt-2in1 NN                                                  |
| NIP1;1NOSTOPRVATTB4  | GGGGACAACCTTTGTATAGAAAAGTTGG<br>GTGAGTGCTACCGATTCTCACGGT | CDS of AtNIP1;1<br>(At4g19030)               | pBiFCt-2in1 NC                                                  |
| SYP51FWATTB1         | GGGGACAAGTTTGTACAAAAAAGCAG<br>GCTCCATGGCGTCTTCATCGGATT   | CDS of AtSYP51<br>(At1g16240)                | pK7WGF2, pH7WGR2                                                |
| SYP51FWATTB3         | GGGGACAACCTTTGTATAATAAAGTTGG<br>AATGGCGTCTTCATCGGATT     | CDS of AtSYP51<br>(At1g16240)                | pBiFCt-2in1 NC,<br>pBiFCt-2in1 NN                               |
| SYP51RVATTB2         | GGGGACCACTTTGTACAAGAAAGCTGG<br>GTATTACATATACTTAACCAACA   | CDS and H3 region of AtSYP51<br>(At1g16240)  | pK7WGF2, pH7WGR2,<br>pBiFCt-2in1 NC,<br>pBiFCt-2in1 NN          |
| SYP52FWATTB1         | GGGGACAAGTTTGTACAAAAAAGCAG<br>GCTTAATGGCGTCTTCATCGGATC   | CDS of AtSYP52<br>(At1g79590)                | pK7WGF2, pH7WGR2                                                |
| SYP52FWATTB3         | GGGGACAACCTTTGTATAATAAAGTTGG<br>AATGGCGTCTTCATCGGATC     | CDS of AtSYP52<br>(At1g79590)                | pBiFCt-2in1 NC,<br>pBiFCt-2in1 NN                               |
| SYP52RVATTB2         | GGGGACCACTTTGTACAAGAAAGCTGG<br>GTATTACAGTACTTAACCAGCA    | CDS and H3 region of AtSYP52<br>(At1g79590)  | pK7WGF2, pH7WGR2,<br>pBiFCt-2in1 NC,<br>pBiFCt-2in1 NN          |
| SYP61FWATTB3         | GGGGACAACCTTTGTATAATAAAGTTGC<br>CATGTCTTCAGCTCAAGATCC    | CDS of AtSYP61<br>(At1g28490)                | pBiFCt-2in1 NC,<br>pBiFCt-2in1 NN                               |
| SYP61RVATTB2         | GGGGACCACTTTGTACAAGAAAGCTGG<br>GTATTAGGTC AAGAAGACAAGAA  | CDS of AtSYP61<br>(At1g28490)                | pBiFCt-2in1 NC,<br>pBiFCt-2in1 NN                               |
| SYP122FWATTB1        | GGGGACAAGTTTGTACAAAAAAGCAG<br>GCTTTATGAACGATCTTCTCCTCCG  | CDS of AtSYP122<br>(At3g52400)               | pK7WGF2, pH7WGR2                                                |
| SYP122FWATTB3        | GGGGACAACCTTTGTATAATAAAGTTGC<br>CATGAACGATCTTCTCCTCCGCT  | CDS of AtSYP122<br>(At3g52400)               | pBiFCt-2in1 NC,<br>pBiFCt-2in1 NN                               |
| SYP122RVATTB2        | GGGGACCACTTTGTACAAGAAAGCTGG<br>GTATTAGCGTAGTAGCCCGCGAT   | CDS and H3 region of AtSYP122<br>(At3g52400) | pK7WGF2, pH7WGR2,<br>pBiFCt-2in1 NC,<br>pBiFCt-2in1 NN          |
| 51H3FWATTB1          | GGGGACAAGTTTGTACAAAAAAGCAG<br>GCTGGATGCGACAAGTTATGAGAG   | H3 region of AtSYP51<br>(At1g16240)          | pK7WGF2                                                         |
| 51H3FWATTB3          | GGGGACAACCTTTGTATAATAAAGTTGC<br>CATGCGACAAGTTATGAGAG     | H3 region of AtSYP51<br>(At1g16240)          | pBiFCt-2in1 NC,<br>pBiFCt-2in1 NN                               |
| 52H3FWATTB1          | GGGGACAAGTTTGTACAAAAAAGCAG<br>GCTGGATGTTTCAACGGCAAGTTA   | H3 region of AtSYP52<br>(At1g79590)          | pK7WGF2                                                         |
| 52H3FWATTB3          | GGGGACAACCTTTGTATAATAAAGTTGC<br>CATGTTTCAACGGCAAGTTA     | H3 region of AtSYP52<br>(At1g79590)          | pBiFCt-2in1 NC,<br>pBiFCt-2in1 NN                               |
| 122H3FWATTB3         | GGGGACAACCTTTGTATAATAAAGTTGC<br>CATGTCGGACCGGCAAAAGAA    | H3 region of AtSYP122<br>(At3g52400)         | pBiFCt-2in1 NC,<br>pBiFCt-2in1 NN                               |

**Supplementary Table 2:** List of primers used.

## Supplementary Figures

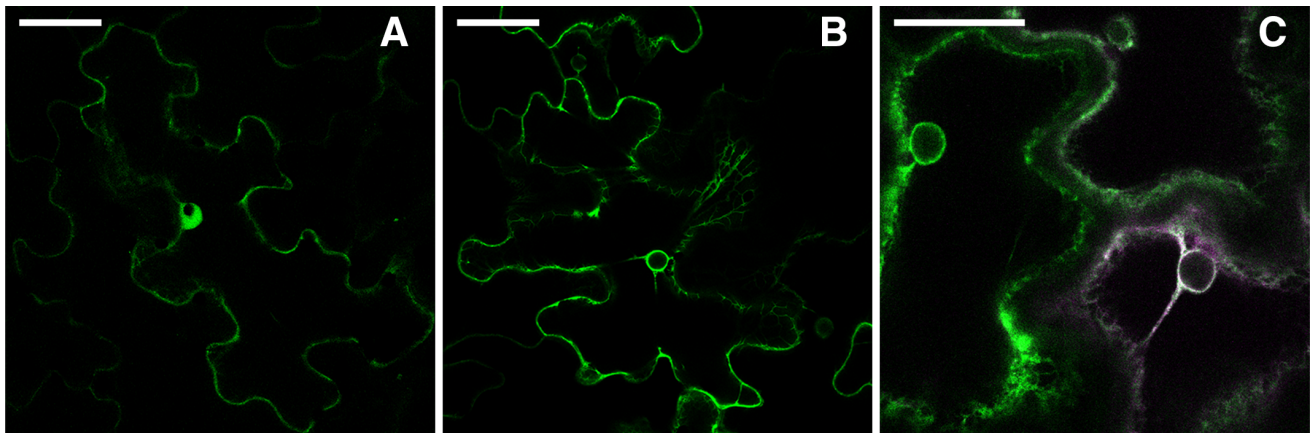

**Supplementary Figure 1:** Transient expression in *Nicotiana tabacum* epidermis of A) NIP1;1::GFP with cytosolic distribution; B) GFP::NIP1;1 associated to the ER; C) GFP::NIP1;1 co-expressed with RFP::NIP1;1. Transformation was performed as previously described (Di Sansebastiano et al. 2004). Scale bar = 20  $\mu$ m.

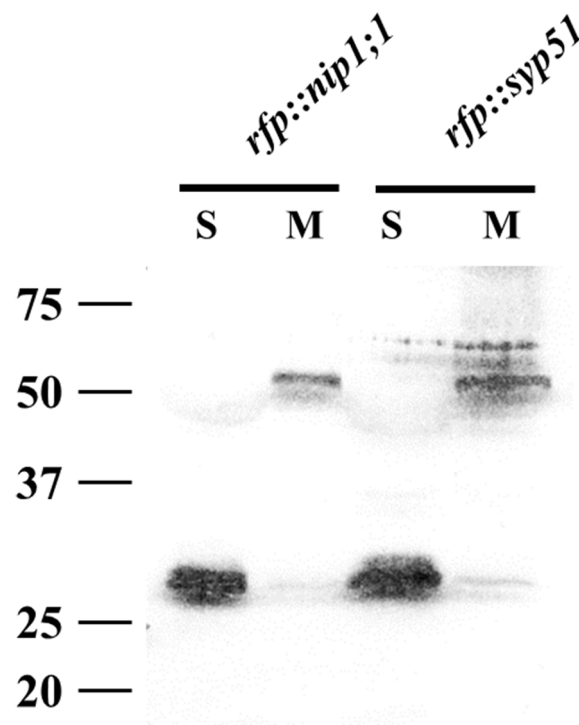**Supplementary Figure 2:**

Proteins were analyzed (Renna et al., 2013) by immunodetection on Western-blot using RFP antibodies (ab62341 Abcam) to confirm RFP::SYP51 and RFP::NIP1;1 overexpression. S= soluble fraction, M= membrane fraction. The numbers in the right represent the relative molecular weight in kDa.

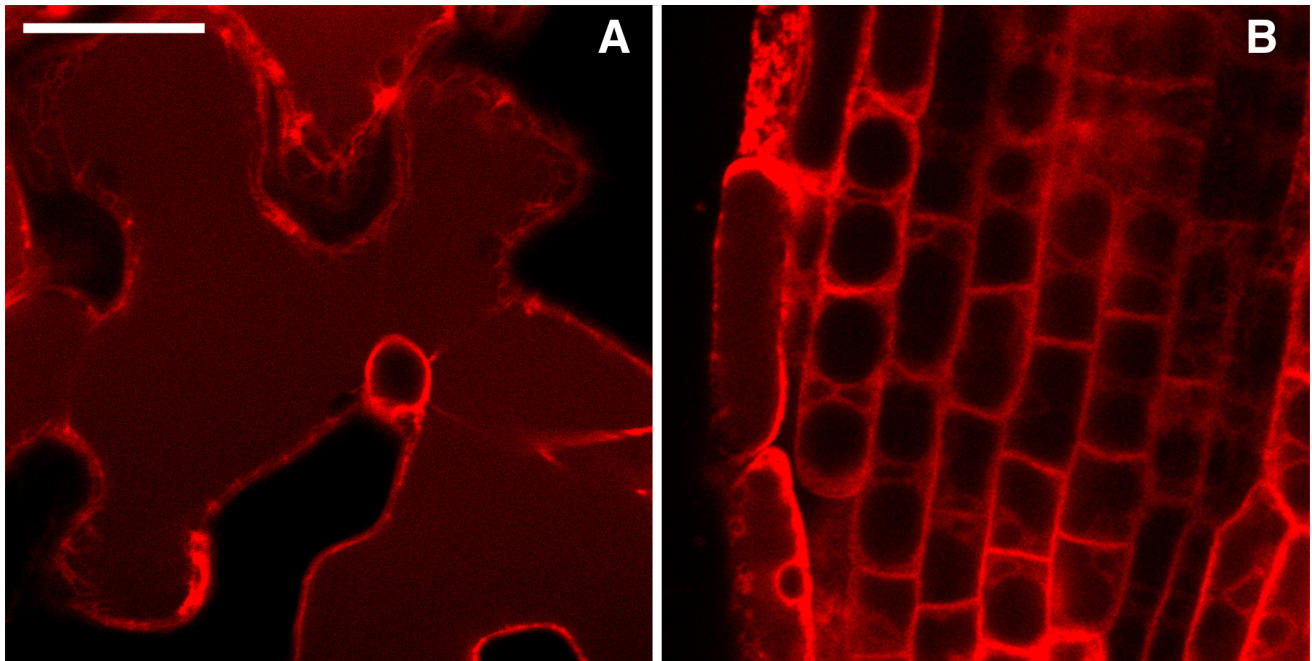

**Supplementary Figure 3:** Confocal images of cells in a transgenic Arabidopsis plant expressing RFP::NIP1;1, **A)** in the leaf epidermis; **B)** in root cells. Scale bar = 20  $\mu$ m

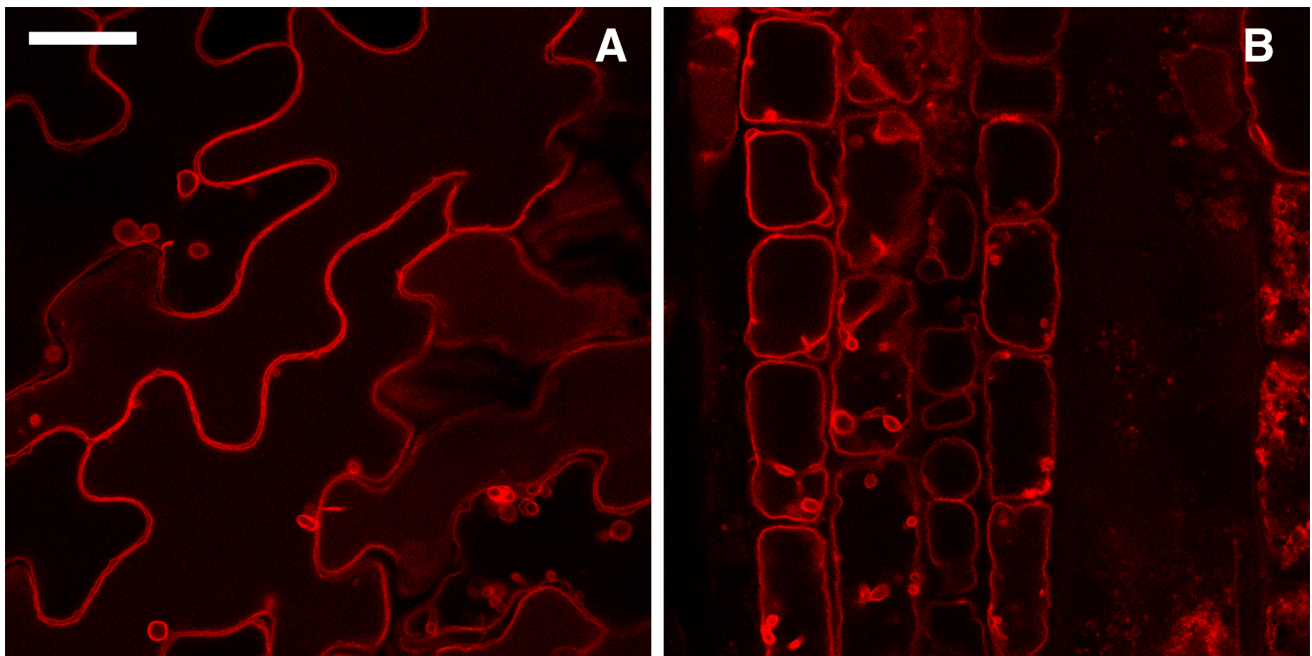

**Supplementary Figure 4:** Confocal images of cells in a transgenic Arabidopsis plant expressing RFP::SYP51, **A)** in the leaf epidermis; **B)** in root cells. Scale bar = 20  $\mu$ m

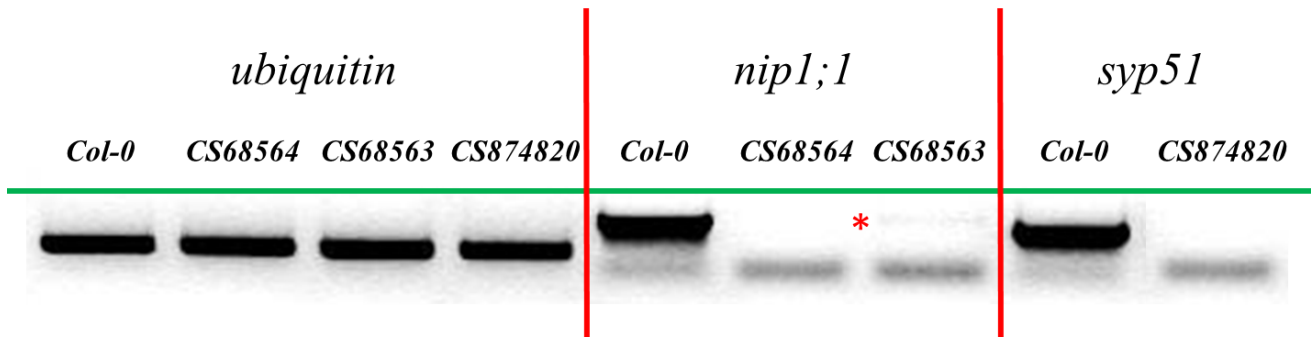

**Supplementary Figure 5:** To confirm the expression suppression of genes in transgenic plants, RNA was isolated from 2-week-old seedlings (RNeasy Plant Mini Kit; Qiagen). The first-strand cDNA was then synthesized using the SuperScript III first-strand synthesis system (Invitrogen). PCR was performed using the High-fidelity DNA Polymerase (Finnzymes, Espoo, Finland) for 35 cycles. For an internal control, the constitutive gene Ubiquitin10 was used. \* evidences highly reduced but not suppressed expression of *nip1;1*.

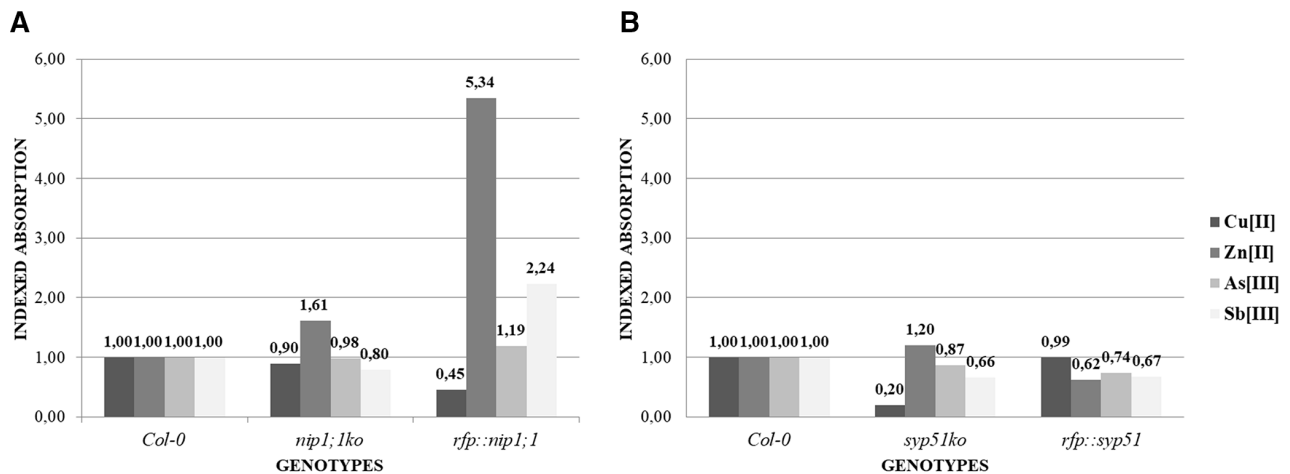

**Supplementary Figure 6:** Indexed Cu[II], Zn[II], As[III] and Sb[III] uptake by control and transgenic plants.

**Supplementary video 1:** Tonoplast “bubbling” in Arabidopsis epidermal cell during co-expression of GFP::SYP51 (green) and RFP::NIP1;1 (red). Yellow signal evidence co-localization of fluoreochromes in aggregates at the bubbling site.
